# Supplementary material for: mRNA aggregates harness danger response for potent cancer immunotherapy
Source: bioRxiv or medRxiv preprint supplement (doi:10.1101/2023.03.12.23287108), 2023-03-17

# Extended Data Figure 1

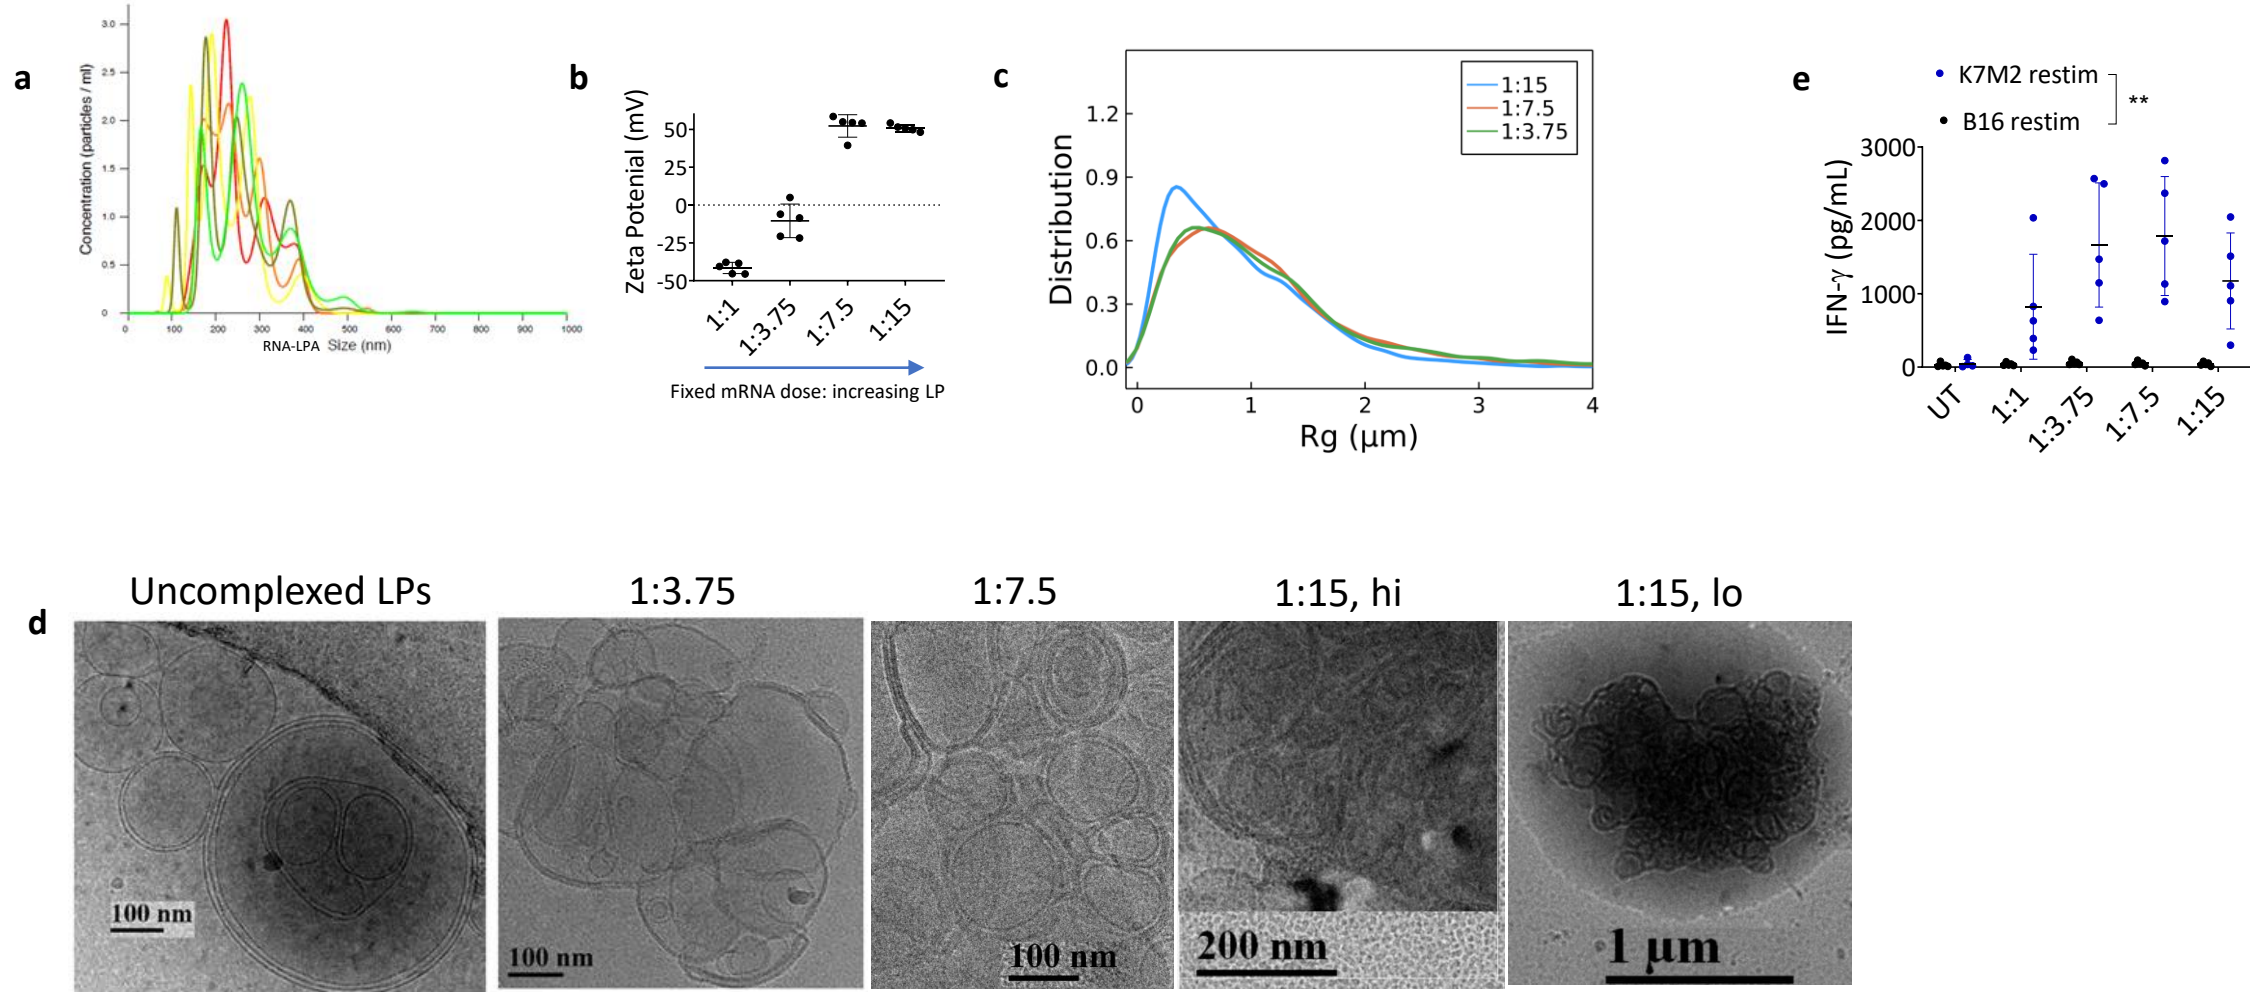

# Extended Data Figure 2

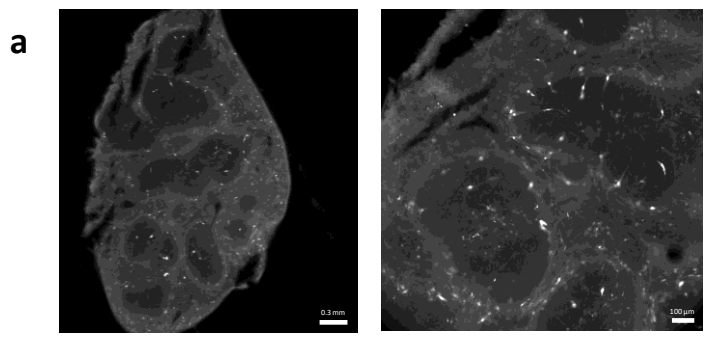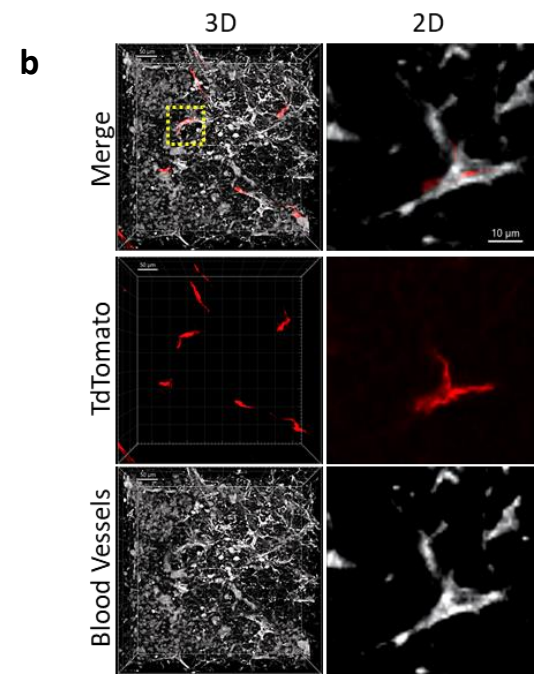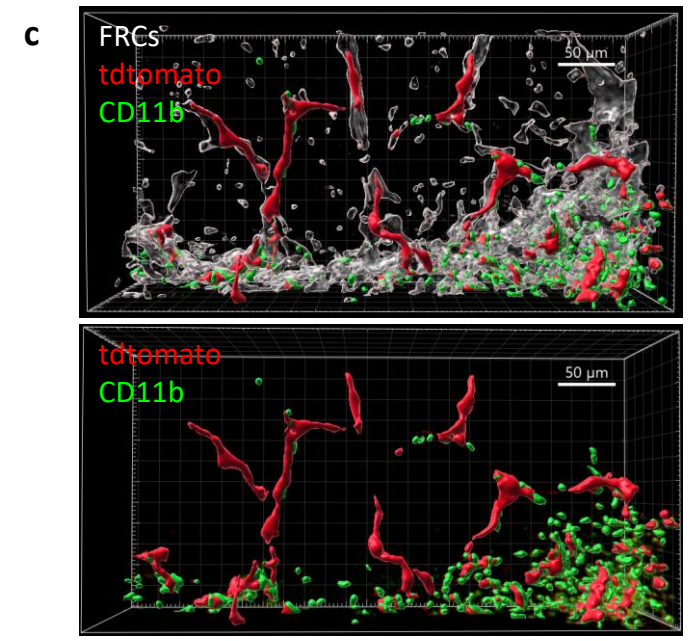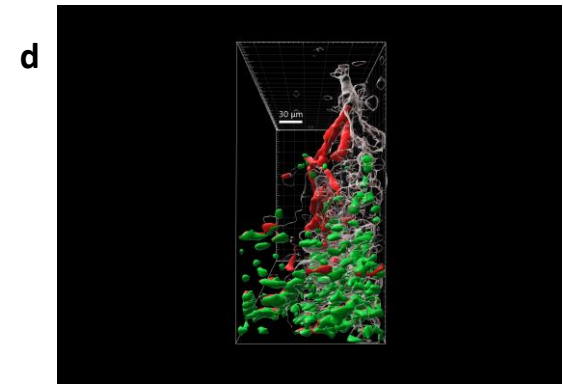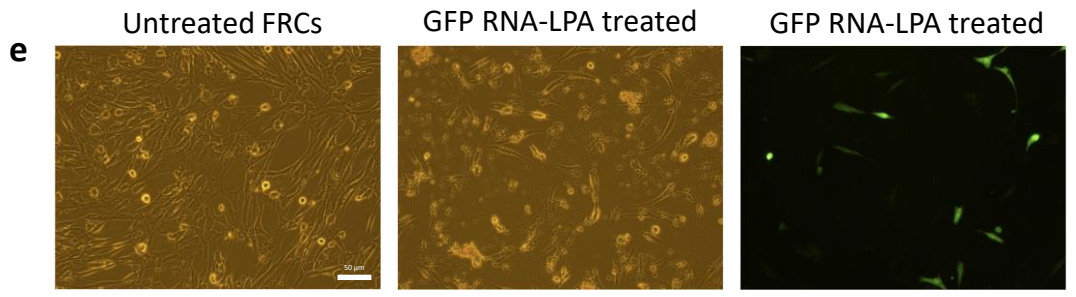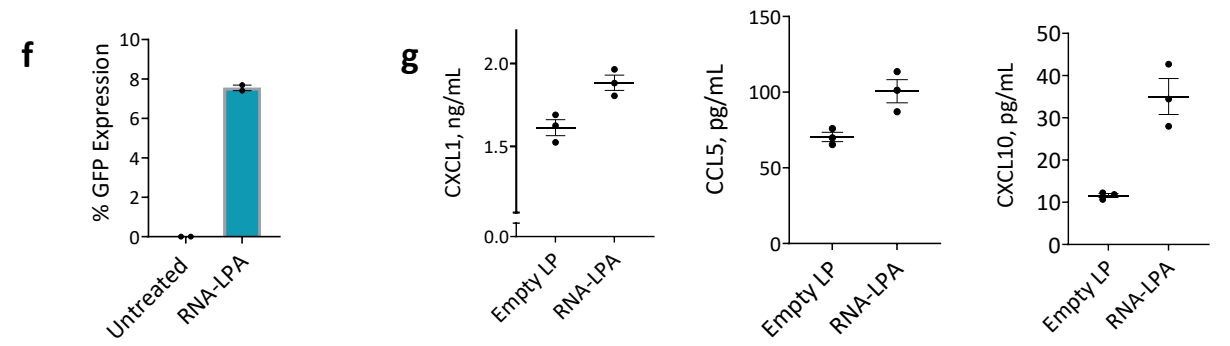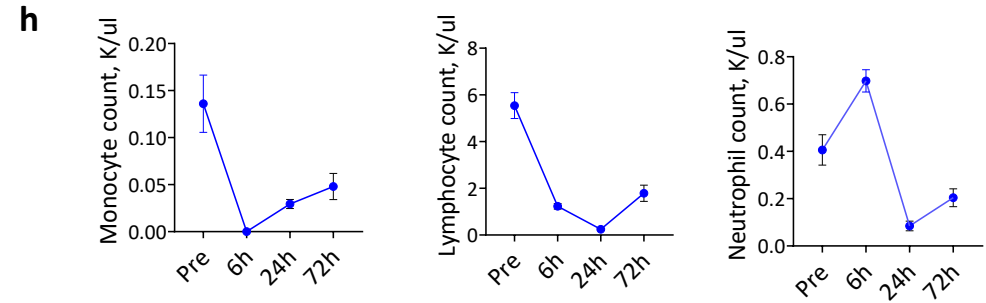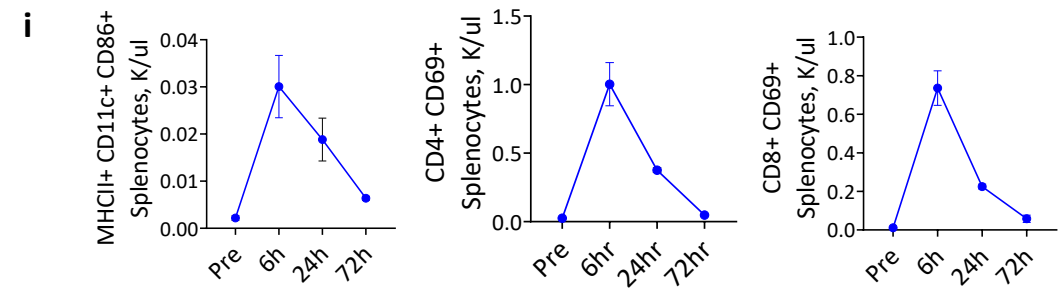

# Extended Data Figure 3

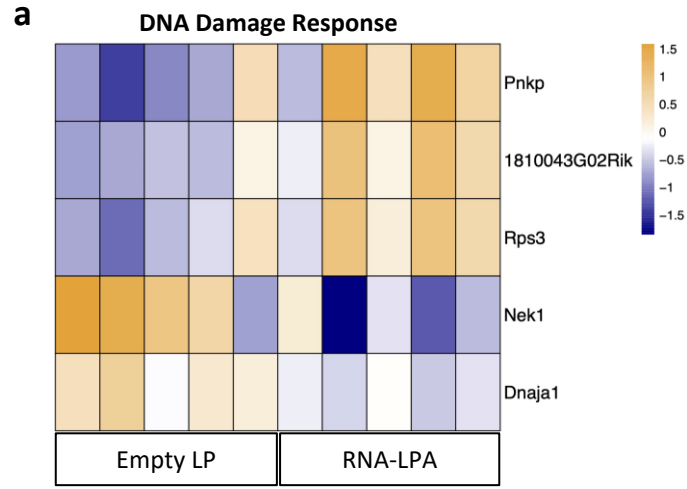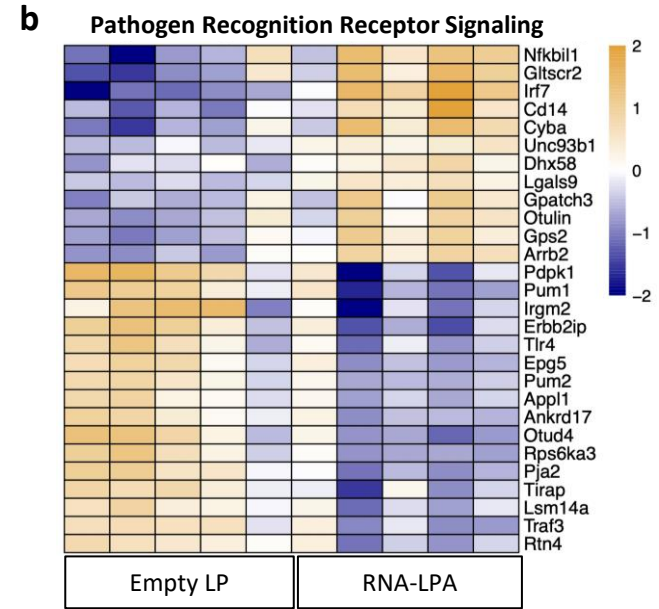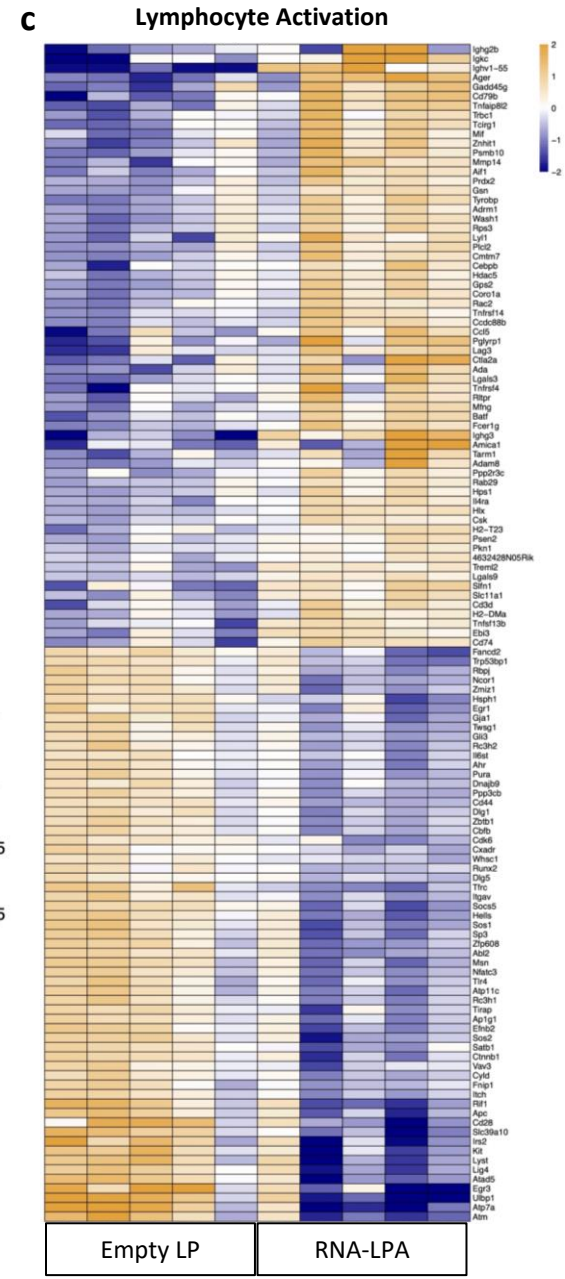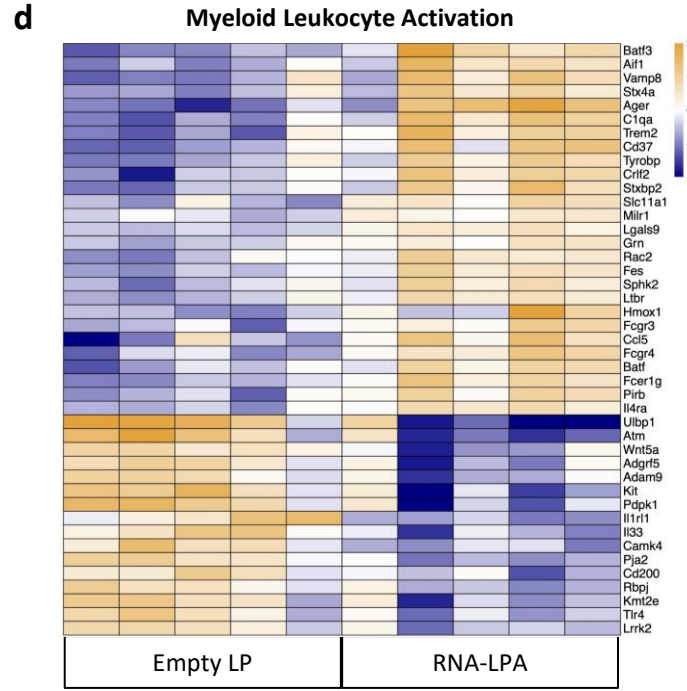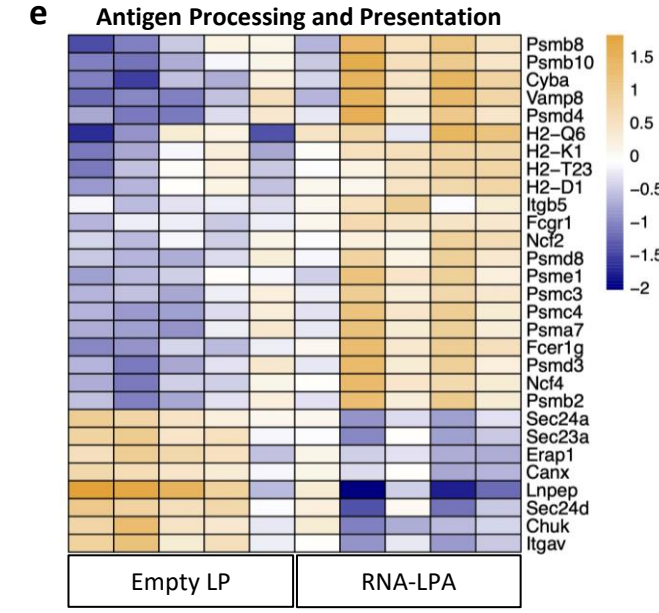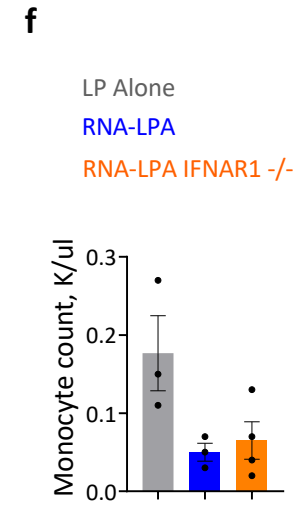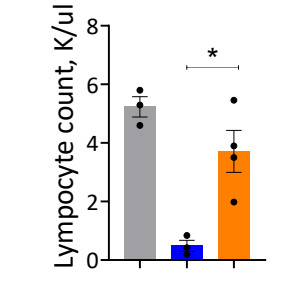

# Extended Data Figure 4

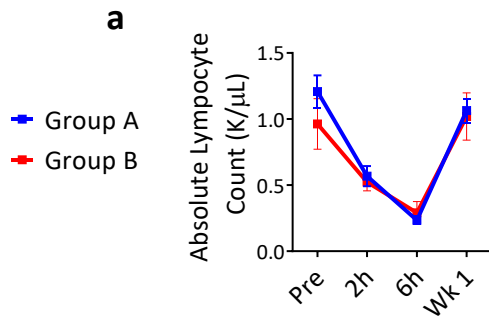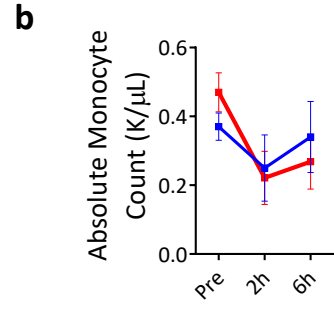

Neoadjuvant RNA-LPA

Post-adjvant MR

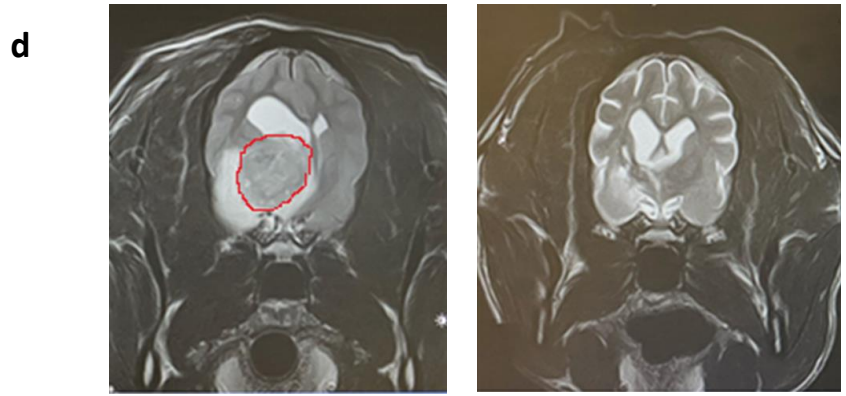

**c**

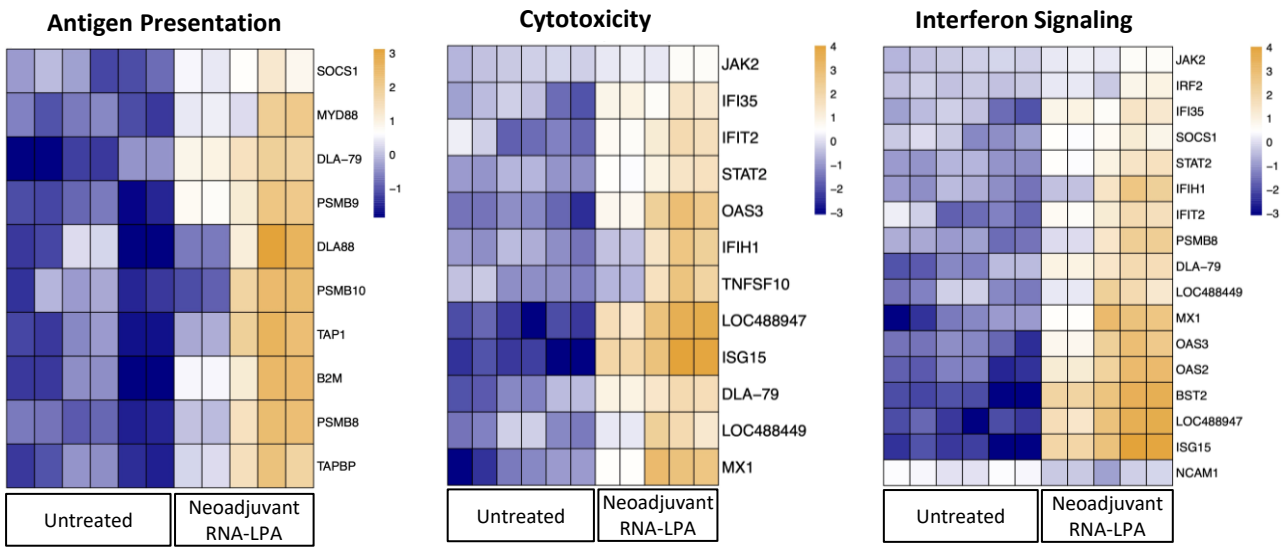

**e**

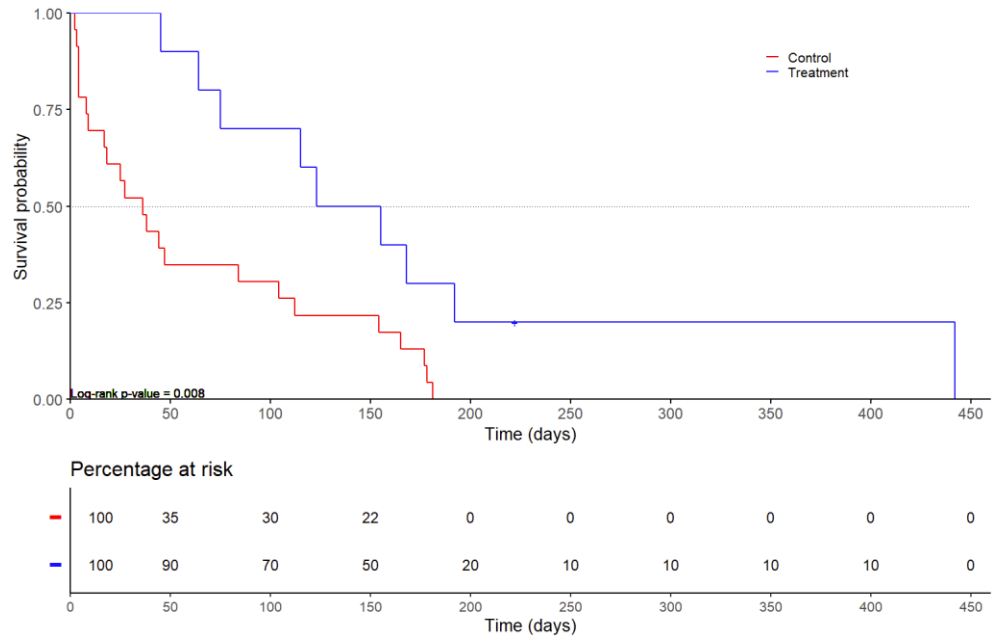

# Extended Data Figure 5

**a**

| Group | Total Number of Animals (Sex) | Subgroup (Termination) | Test Article   | Route |
|-------|-------------------------------|------------------------|----------------|-------|
| 1     | 10 (5M/5F)                    | 1a (35±1 days)         | Vehicle        | i.v.  |
|       | 10 (5M/5F)                    | 1b (56±2 days)         |                |       |
|       | 10 (5M/5F)                    | 1c (112±3 days)        |                |       |
| 2     | 10 (5M/5F)                    | 2a (35 ± 1 days)       | LP             | i.v.  |
|       | 10 (5M/5F)                    | 2b (56±2 days)         |                |       |
|       | 10 (5M/5F)                    | 2c (112±3 days)        |                |       |
| 3     | 10 (5M/5F)                    | 3a (35±1 days)         | RNA-LPA (low)  | i.v.  |
|       | 10 (5M/5F)                    | 3b (56±2 days)         |                |       |
|       | 10 (5M/5F)                    | 3c (112±3 days)        |                |       |
| 4     | 10 (5M/5F)                    | 4a (35 ± 1 days)       | RNA-LPA (High) | i.v.  |
|       | 10 (5M/5F)                    | 4b (56±2 days)         |                |       |
|       | 10 (5M/5F)                    | 4c (112±3 days)        |                |       |

**b**

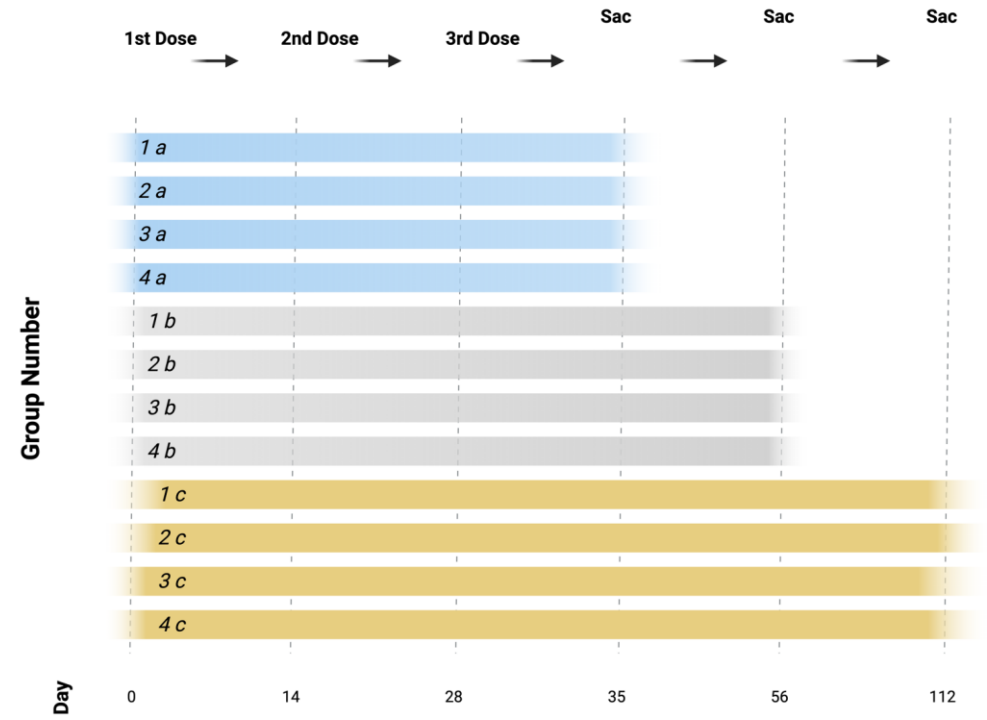

**c**

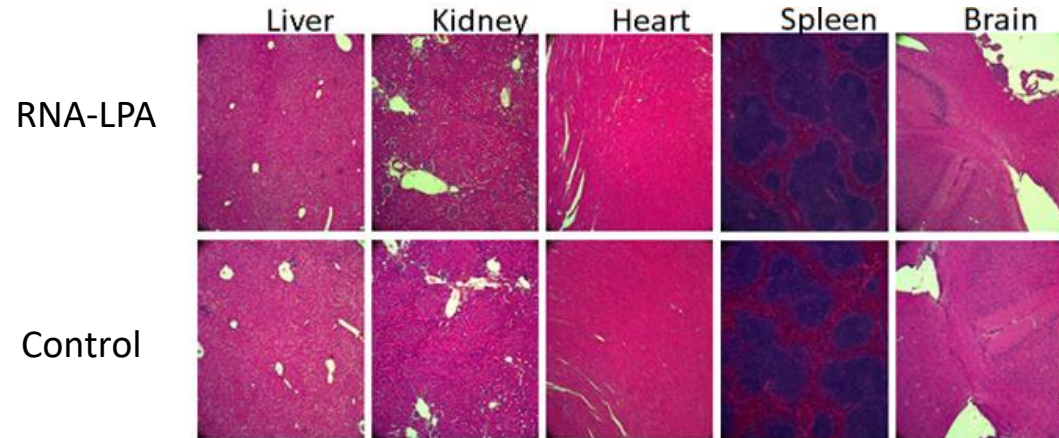

# Extended Data Figure 6

**a**

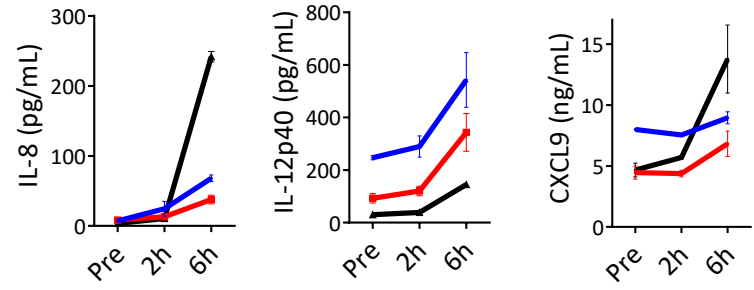

**b**

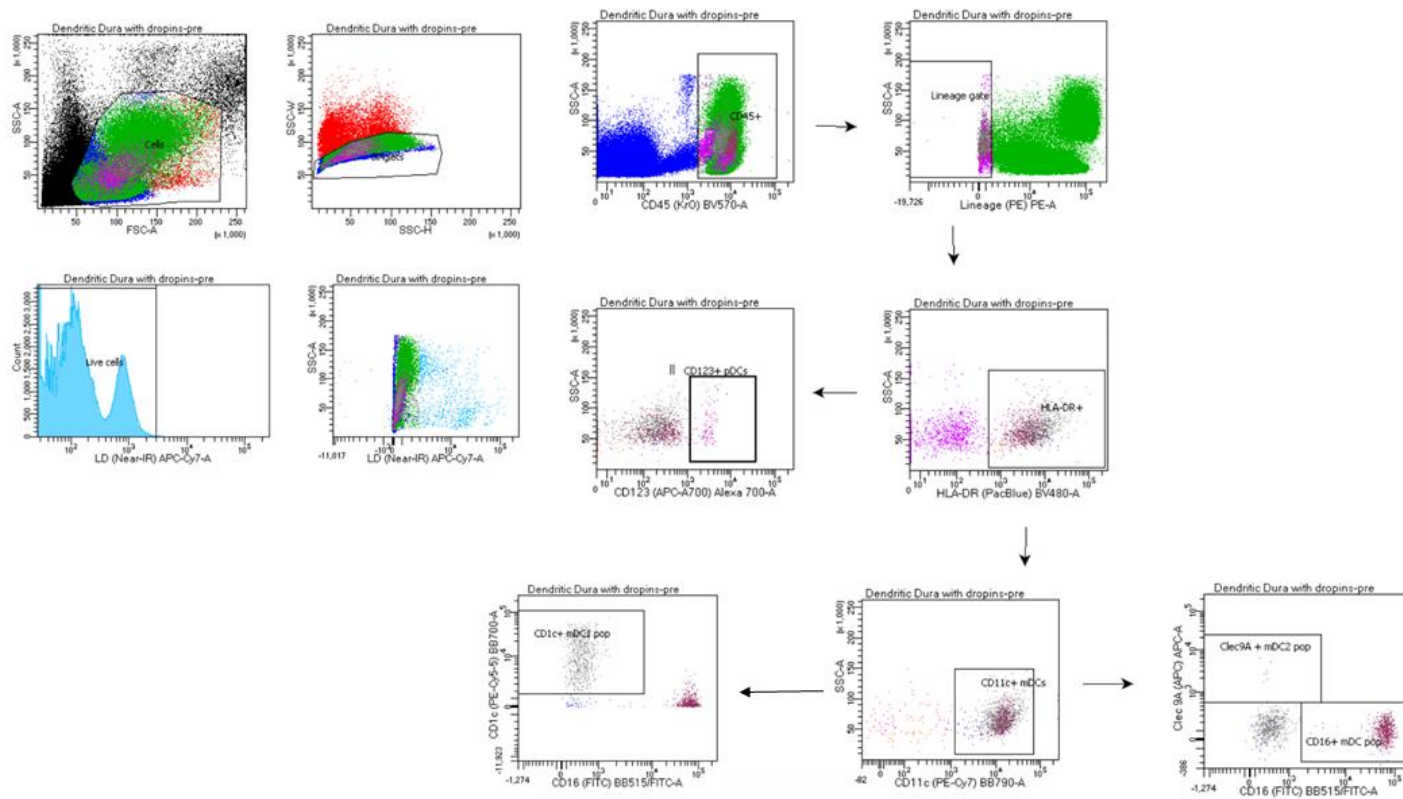

# Extended Data Figure 7

**a**

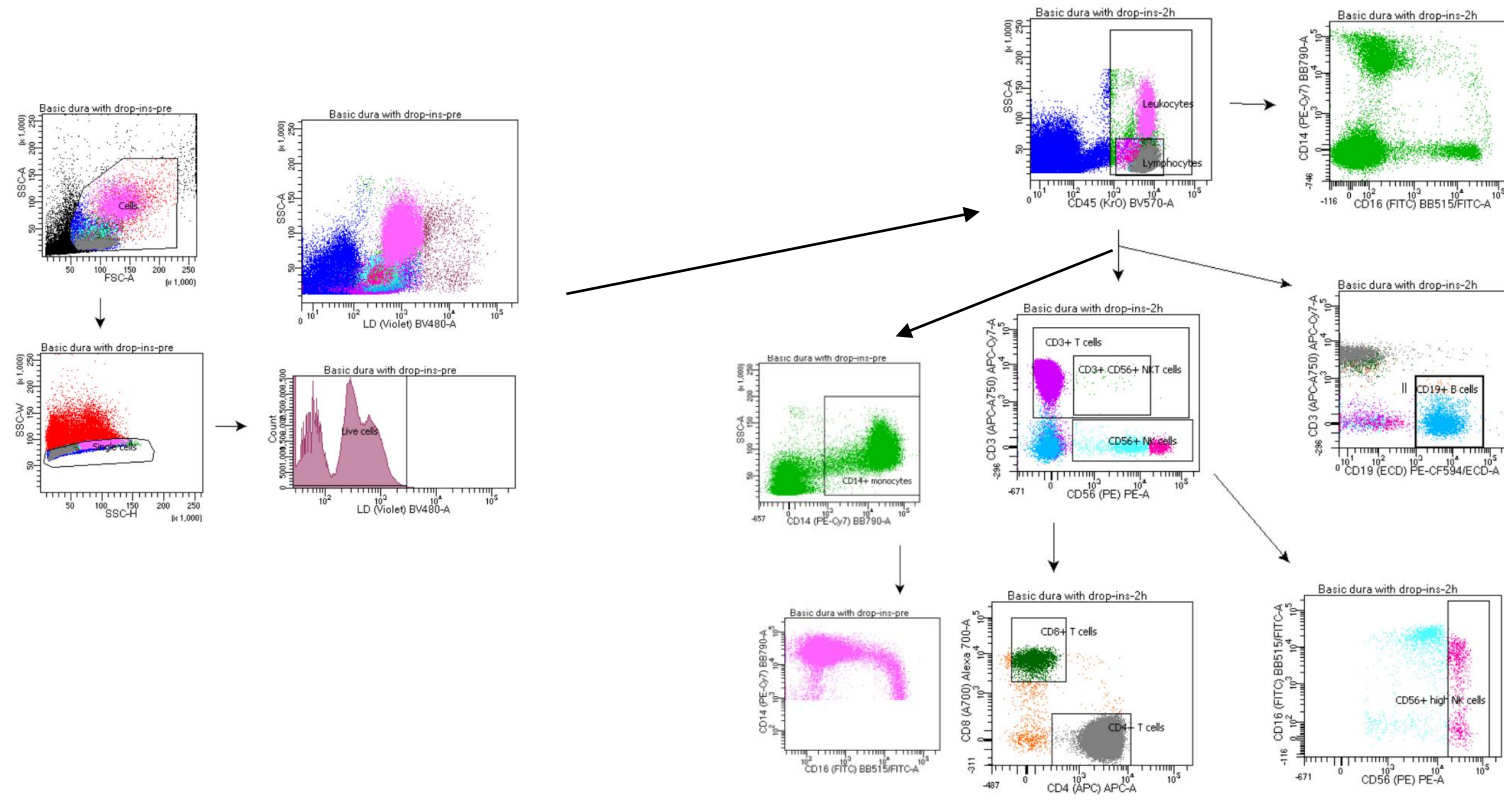

**b**

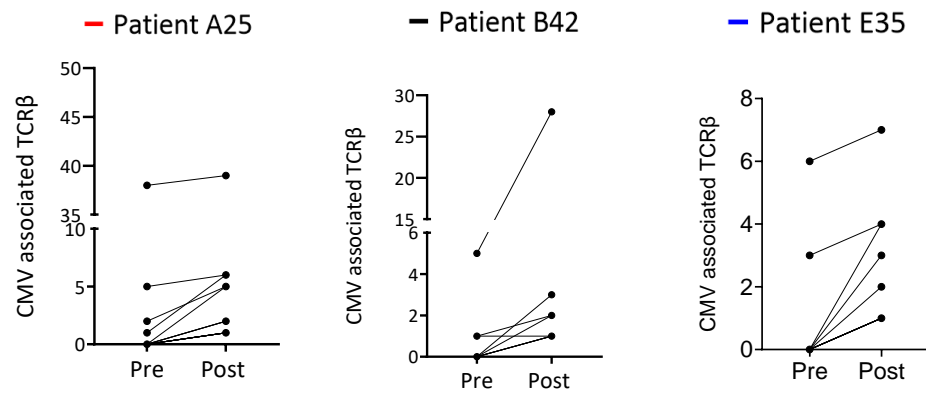

# Extended Data Figure 8

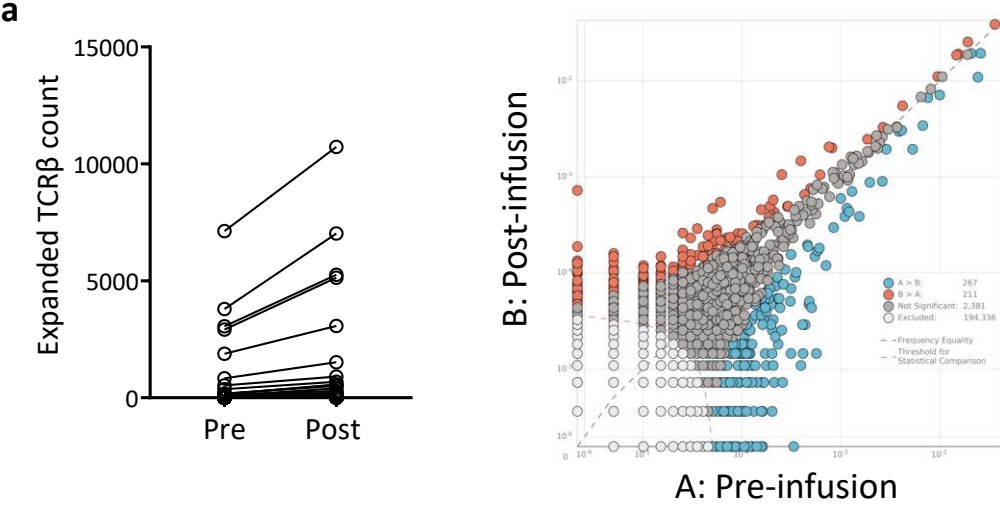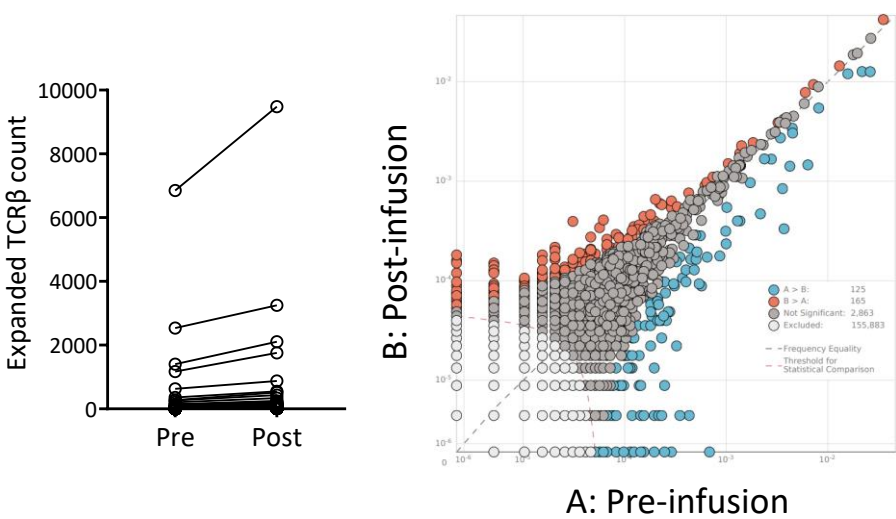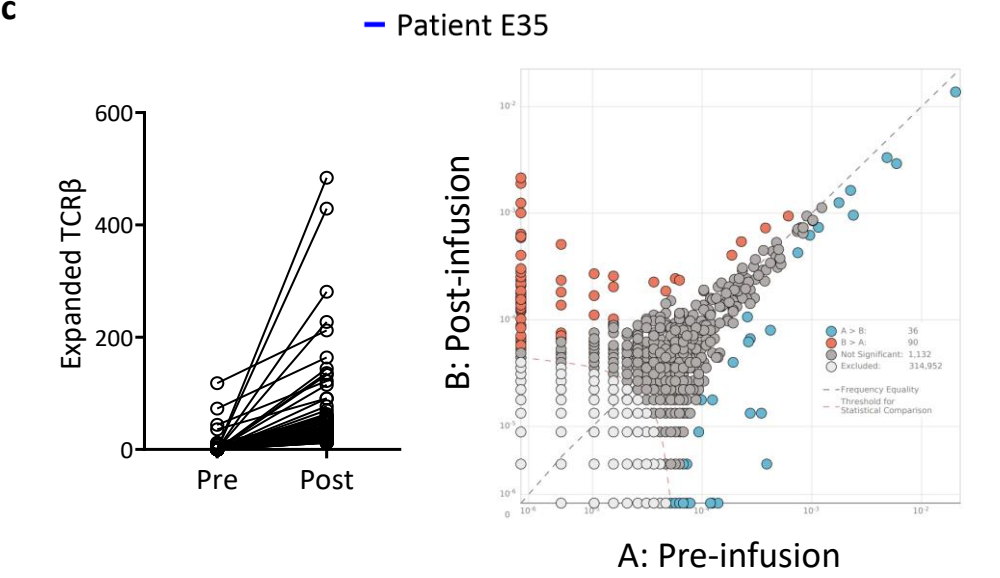

Supplement: Supplementary file [file media-1.pdf]
